# Supplementary material for: Development of macroscopically ordered liquid crystalline hydrogels from biopolymers with robust antibacterial activity for controlled drug delivery applications
Source: Royal Society of Chemistry journal article supplement (doi:10.1039/d1py00610j), 2021-01-01
Supplement: d1py00610j1.pdf [file d1py00610j1.pdf]

## Supporting information

### Development of Macroscopically Ordered Liquid crystalline hydrogel from Biopolymers with robust Antibacterial activity for controlled drug delivery applications

Reshma L. Raveendran<sup>a</sup>, Thayyath S. Anirudhan<sup>a,\*</sup>

<sup>a</sup> Department of Chemistry, University of Kerala, Kariavattom, Thiruvananthapuram-695581

Kerala, India.

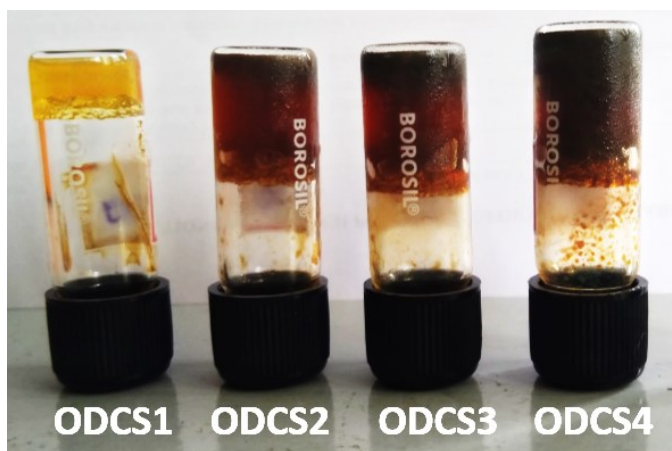

Photograph of Nanosilver-Schiff base hydrogels (ODCS) with varying concentration of  $\text{AgNO}_3$  (0.06 M, 0.08 M, 0.1 M and 0.15 M)

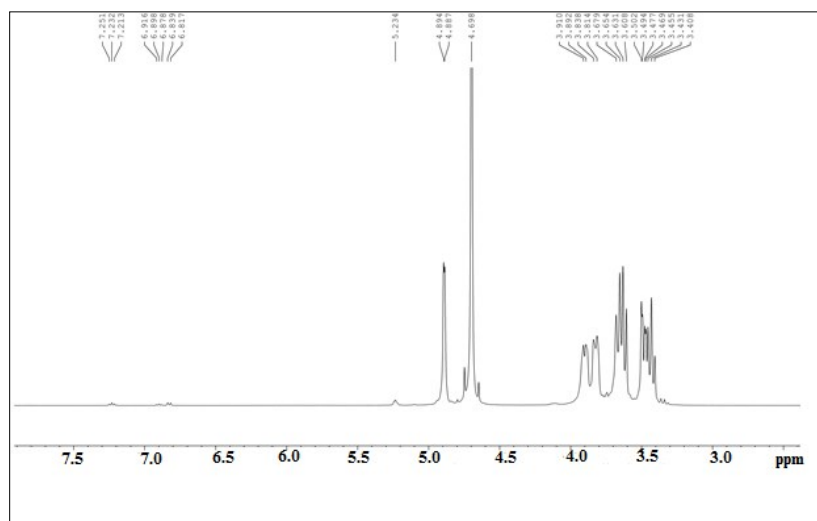

Figure S1 a.  $^1\text{H}$  NMR spectra of Dextran.

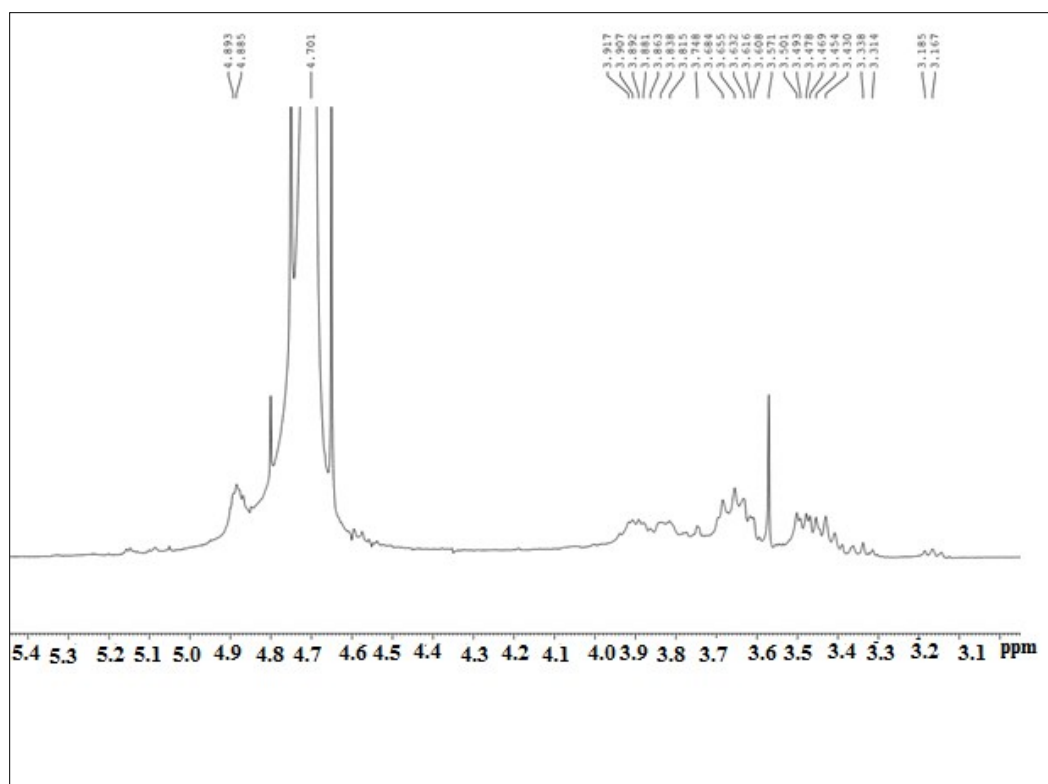

**Figure S1 b.**  $^1\text{H}$  NMR spectra of Oxidized dextran

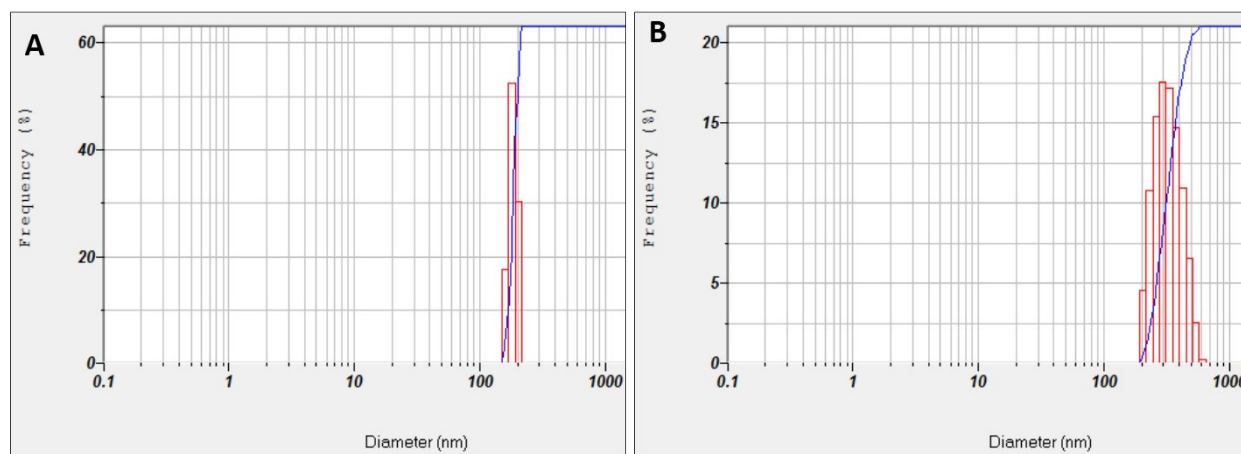

**Figure S2.** Dynamic Light Scattering studies of A) ODCS hydrogel B) Doxorubicin loaded ODCS hydrogel.

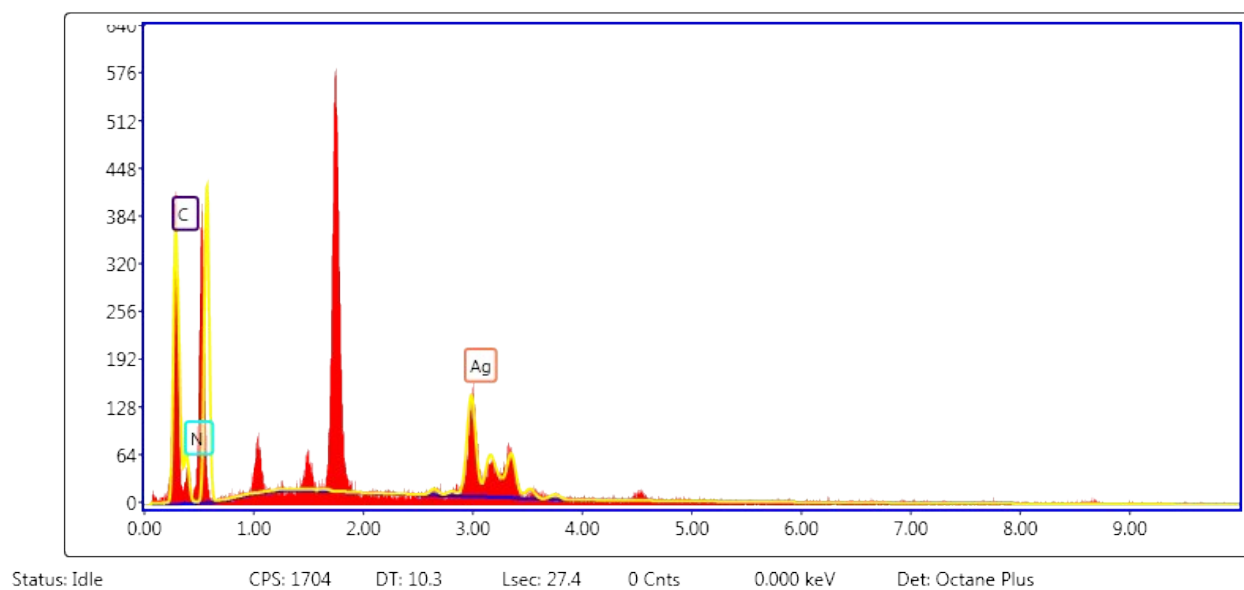

**Figure S3.** EDAX spectra of ODCS hydrogel.

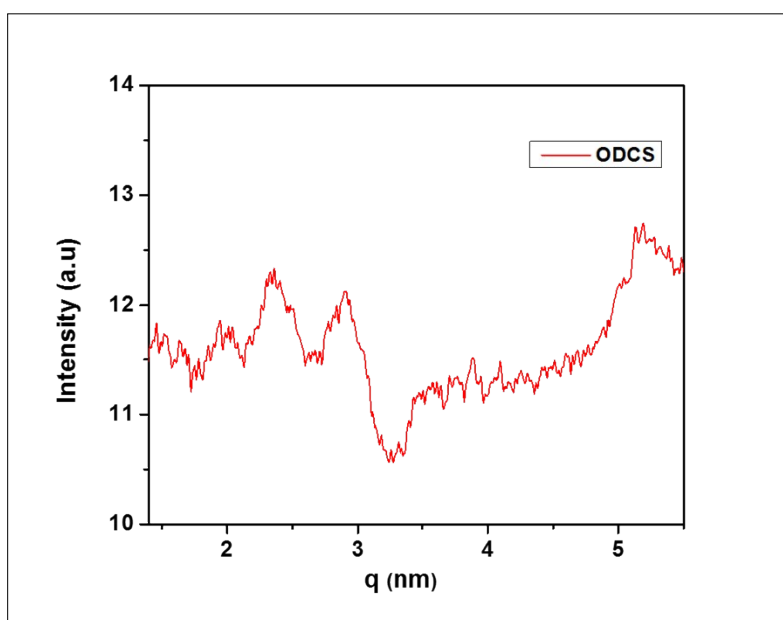

**Figure S4.** SAXS of ODCS hydrogel (d spacing calculated from the equation  $d = \frac{2\pi}{q}$  where q is the scattering vector).

**Table S1.** Drug loading and drug encapsulation efficiency at pH 7.4.

| Concentration of Doxorubicin Hydrochloride (10 mg/mL) | Drug loading efficiency (DLE) (%) | Drug Encapsulation Efficiency (DEE) (%) |
|-------------------------------------------------------|-----------------------------------|-----------------------------------------|
| 10                                                    | 23                                | 32                                      |
| 25                                                    | 35                                | 41                                      |
| 50                                                    | 58                                | 62                                      |
| 75                                                    | 88                                | 91                                      |
| 100                                                   | 91.6                              | 93                                      |

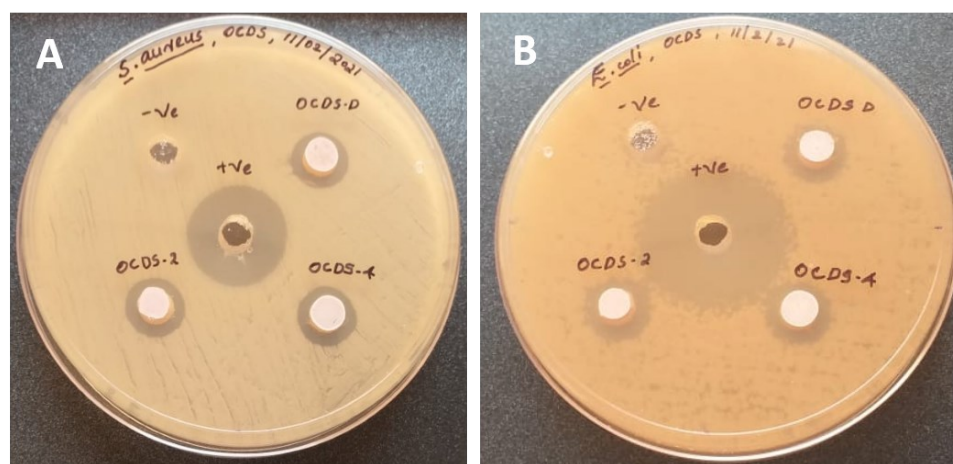

**Figure S5.** Agar well diffusion assay of ODSCS hydrogels against Gram positive *S. aureus* and Gram negative *E. coli*.
